# Supplementary material for: Human Exposure to Bisphenols, Parabens, and Benzophenones, and Its Relationship with the Inflammatory Response: A Systematic Review
Source: MDPI journal article supplement (doi:10.3390/ijms24087325), 2023-04-15
Supplement: s1 [file s1]

Supplementary Table S1. Search strategies for Pubmed, Scopus and Web of Science

| Pubmed (Medline) |                                                                                                                                                                                                                                                                                                                                                                                                                                                                                                                                                                                                                                                                                                                                                                                                                                                                                                                                                                                                                                                                                                                                                                                                                                                                                                                                                                                                                                                                        |
|------------------|------------------------------------------------------------------------------------------------------------------------------------------------------------------------------------------------------------------------------------------------------------------------------------------------------------------------------------------------------------------------------------------------------------------------------------------------------------------------------------------------------------------------------------------------------------------------------------------------------------------------------------------------------------------------------------------------------------------------------------------------------------------------------------------------------------------------------------------------------------------------------------------------------------------------------------------------------------------------------------------------------------------------------------------------------------------------------------------------------------------------------------------------------------------------------------------------------------------------------------------------------------------------------------------------------------------------------------------------------------------------------------------------------------------------------------------------------------------------|
| Date             | 2/1/2023                                                                                                                                                                                                                                                                                                                                                                                                                                                                                                                                                                                                                                                                                                                                                                                                                                                                                                                                                                                                                                                                                                                                                                                                                                                                                                                                                                                                                                                               |
| Strategy         | #1 AND #2                                                                                                                                                                                                                                                                                                                                                                                                                                                                                                                                                                                                                                                                                                                                                                                                                                                                                                                                                                                                                                                                                                                                                                                                                                                                                                                                                                                                                                                              |
| #1               | <p>("bisphenols" [Title/Abstract] OR "bisphenol A" [Title/Abstract] OR "bisphenol S" [Title/Abstract] OR "bisphenol F" [Title/Abstract] OR "bisphenol A-glycidyl methacrylate" [Mesh] OR "bisphenol A-glycidyl methacrylate" [Title/Abstract] OR "bisphenol A diglycidyl ether" [Title/Abstract] OR "bisphenol F diglycidyl ether" [Title/Abstract] OR "parabens" [Mesh] OR "parabens" [Title/Abstract] OR "methylparaben" [Title/Abstract] OR "ethylparaben" [Title/Abstract] OR "propylparaben" [Title/Abstract] OR "butylparaben" [Title/Abstract] OR "benzophenones" [Mesh] OR "benzophenones" [Title/Abstract] OR "benzophenone 1" [Title/Abstract] OR "2,4-dihydroxy-benzophenone" [Title/Abstract] OR "benzophenone 2" [Title/Abstract] OR "2,2',4,4'-tetrahydroxybenzophenone" [Title/Abstract] OR "benzophenone 3" [Title/Abstract] OR "oxybenzone" [Title/Abstract] OR "benzophenone 4" [Title/Abstract] OR "sulisobenzene" [Title/Abstract] OR "4-hydroxybenzophenone" [Title/Abstract] OR "benzophenone 5" [Title/Abstract] OR "benzophenone 6" [Title/Abstract] OR "2,2'-dihydroxy-4,4'-dimethoxybenzophenone" [Title/Abstract] OR "benzophenone 7" [Title/Abstract] OR "5-chloro-2-hydroxybenzophenone" [Title/Abstract] OR "benzophenone 8" [Title/Abstract] OR "dioxibenzene" [Title/Abstract] OR "benzophenone 9" [Title/Abstract] OR "benzophenone 10" [Title/Abstract] OR "benzophenone 12" [Title/Abstract] OR "octabenzene" [Title/Abstract])</p> |
| #2               | <p>("Inflammation Mediators" [Mesh] OR "inflammation mediators" [Title/Abstract] OR "Inflammation" [Mesh] OR "Inflammation" [Title/Abstract] OR "cytokines" [Mesh] OR "cytokines" [Title/Abstract] OR "intracellular adhesion molecules" [Title/Abstract] OR "humoral mediators" [Title/Abstract] OR "c reactive protein" [Title/Abstract] OR "inflammatory milieu" [Title/Abstract] OR "phagocytic leukocytes" [Title/Abstract] OR "antibodies" [Title/Abstract] OR "complement proteins" [Title/Abstract] OR "receptor Activator of Nuclear Factor-kappa B" [Mesh] OR "receptor Activator of Nuclear Factor-kappa B" [Title/Abstract] OR "prostaglandin-Endoperoxide Synthases" [Mesh] OR "prostaglandin-Endoperoxide Synthases" [Title/Abstract])</p>                                                                                                                                                                                                                                                                                                                                                                                                                                                                                                                                                                                                                                                                                                               |
| Scopus           |                                                                                                                                                                                                                                                                                                                                                                                                                                                                                                                                                                                                                                                                                                                                                                                                                                                                                                                                                                                                                                                                                                                                                                                                                                                                                                                                                                                                                                                                        |
| Date             | 2/1/2023                                                                                                                                                                                                                                                                                                                                                                                                                                                                                                                                                                                                                                                                                                                                                                                                                                                                                                                                                                                                                                                                                                                                                                                                                                                                                                                                                                                                                                                               |
| Strategy         | #1 AND #2                                                                                                                                                                                                                                                                                                                                                                                                                                                                                                                                                                                                                                                                                                                                                                                                                                                                                                                                                                                                                                                                                                                                                                                                                                                                                                                                                                                                                                                              |
| #1               | <p>TITLE-ABS-KEY ("bisphenols" OR "bisphenol A" OR "bisphenol S" OR "bisphenol F" OR "bisphenol A-glycidyl methacrylate" OR "bisphenol A diglycidyl ether" OR "bisphenol F diglycidyl ether" OR "benzophenones" OR "benzophenone 1" OR "2,4-dihydroxy-benzophenone" OR "benzophenone 2" OR "2,2',4,4'-tetrahydroxybenzophenone" OR "benzophenone 3" OR "oxybenzone" OR "benzophenone 4" OR "sulisobenzene" OR "4-hydroxybenzophenone" OR "benzophenone 5" OR "benzophenone 6" OR "2,2'-dihydroxy-4,4'-dimethoxybenzophenone" OR "BP6" OR "benzophenone 7" OR "5-chloro-2-hydroxybenzophenone" OR "benzophenone 8" OR "dioxibenzene" OR "BP8" OR "benzophenone 9" OR "benzophenone 10" OR "benzophenone 12" OR "octabenzene" OR "parabens" OR "methylparaben" OR "ethylparaben" OR "propylparaben" OR "butylparaben")</p>                                                                                                                                                                                                                                                                                                                                                                                                                                                                                                                                                                                                                                               |
| #2               | <p>TITLE-ABS-KEY ("Inflammation Mediators" OR "Inflammation" OR "cytokines" OR "intracellular adhesion molecules" OR "humoral mediators" OR "c reactive protein" OR "inflammatory milieu" OR "phagocytic leukocytes" OR "antibodies" OR "complement proteins" OR "receptor Activator of Nuclear Factor-kappa B" OR "prostaglandin-Endoperoxide Synthases")</p>                                                                                                                                                                                                                                                                                                                                                                                                                                                                                                                                                                                                                                                                                                                                                                                                                                                                                                                                                                                                                                                                                                         |
| Web of Science   |                                                                                                                                                                                                                                                                                                                                                                                                                                                                                                                                                                                                                                                                                                                                                                                                                                                                                                                                                                                                                                                                                                                                                                                                                                                                                                                                                                                                                                                                        |
| Date             | 2/1/2023                                                                                                                                                                                                                                                                                                                                                                                                                                                                                                                                                                                                                                                                                                                                                                                                                                                                                                                                                                                                                                                                                                                                                                                                                                                                                                                                                                                                                                                               |
| Strategy         | (#1 OR #2) AND (#3 OR #4)                                                                                                                                                                                                                                                                                                                                                                                                                                                                                                                                                                                                                                                                                                                                                                                                                                                                                                                                                                                                                                                                                                                                                                                                                                                                                                                                                                                                                                              |
| #1               | <p>TI=("bisphenols" OR "bisphenol A" OR "bisphenol S" OR "bisphenol F" OR "bisphenol A-glycidyl methacrylate" OR "bisphenol A diglycidyl ether" OR "bisphenol F diglycidyl ether" OR "benzophenones" OR "benzophenone 1" OR "2,4-dihydroxy-benzophenone" OR "benzophenone 2" OR "2,2',4,4'-tetrahydroxybenzophenone" OR "benzophenone 3" OR "oxybenzone" OR "benzophenone 4" OR "sulisobenzene" OR "4-hydroxybenzophenone" OR "benzophenone 5" OR "benzophenone 6" OR "2,2'-dihydroxy-4,4'-dimethoxybenzophenone" OR "benzophenone 7" OR "5-chloro-2-hydroxybenzophenone" OR "benzophenone 8" OR "dioxibenzene" OR "benzophenone 9" OR "benzophenone 10" OR "benzophenone 12" OR "octabenzene" OR "parabens" OR "methylparaben" OR "ethylparaben" OR "propylparaben" OR "butylparaben")</p>                                                                                                                                                                                                                                                                                                                                                                                                                                                                                                                                                                                                                                                                            |
|                  |                                                                                                                                                                                                                                                                                                                                                                                                                                                                                                                                                                                                                                                                                                                                                                                                                                                                                                                                                                                                                                                                                                                                                                                                                                                                                                                                                                                                                                                                        |
|                  | <p>AB=("bisphenols" OR "bisphenol A" OR "bisphenol S" OR "bisphenol F" OR "bisphenol A-glycidyl methacrylate" OR "bisphenol A diglycidyl ether" OR "bisphenol F diglycidyl ether" OR "benzophenones" OR "benzophenone 1" OR "2,4-dihydroxy-benzophenone" OR "benzophenone 2" OR "2,2',4,4'-tetrahydroxybenzophenone" OR "benzophenone 3" OR "oxybenzone" OR "benzophenone 4" OR "sulisobenzene" OR "4-hydroxybenzophenone" OR "benzophenone 5" OR "benzophenone 6" OR "2,2'-dihydroxy-4,4'-dimethoxybenzophenone" OR "benzophenone 7" OR "5-chloro-2-hydroxybenzophenone" OR "benzophenone 8" OR "dioxibenzene" OR "benzophenone 9" OR "benzophenone 10" OR "benzophenone 12" OR "octabenzene" OR "parabens" OR "methylparaben" OR "ethylparaben" OR "propylparaben" OR "butylparaben")</p>                                                                                                                                                                                                                                                                                                                                                                                                                                                                                                                                                                                                                                                                            |
| #3               | <p>TI=("Inflammation Mediators" OR "Inflammation" OR "cytokines" OR "intracellular adhesion molecules" OR "humoral mediators" OR "c reactive protein" OR "inflammatory milieu" OR "phagocytic leukocytes" OR "antibodies" OR "complement proteins" OR "receptor Activator of Nuclear Factor-kappa B" OR "prostaglandin-Endoperoxide Synthases")</p>                                                                                                                                                                                                                                                                                                                                                                                                                                                                                                                                                                                                                                                                                                                                                                                                                                                                                                                                                                                                                                                                                                                    |
| #4               | <p>AB=("Inflammation Mediators" OR "Inflammation" OR "cytokines" OR "intracellular adhesion molecules" OR "humoral mediators" OR "c reactive protein" OR "inflammatory milieu" OR "phagocytic leukocytes" OR "antibodies" OR "complement proteins" OR "receptor Activator of Nuclear Factor-kappa B" OR "prostaglandin-Endoperoxide Synthases")</p>                                                                                                                                                                                                                                                                                                                                                                                                                                                                                                                                                                                                                                                                                                                                                                                                                                                                                                                                                                                                                                                                                                                    |

Supplementary Table S2. Additional information collected from the included studies in this systematic review

| Article Number | Reference                       | Population characteristics   |                |                                                                            | Characteristics of exposure assessment |        |           | Characteristics of outcome assessment                                                                            |            |
|----------------|---------------------------------|------------------------------|----------------|----------------------------------------------------------------------------|----------------------------------------|--------|-----------|------------------------------------------------------------------------------------------------------------------|------------|
|                |                                 | Health condition             | Gender         | Age                                                                        | Quantification methodology             | Volume | LOD       | Quantification methodology                                                                                       | FD (%)     |
| 1              | Ashley-Martin et al., 2015 [56] | Healthy                      | Pregnant women | >30 (most of them)                                                         | GC-MS-MS                               | N.R.   | 0.20      | ELISA                                                                                                            | N.R.       |
| 2              | Aung et al., 2019 [57]          | Healthy                      | Pregnant women | >30 (most of them)                                                         | ID-LC-MS/MS                            | N.R.   | N.R.      | ELISA and Milliplex MAP High Sensitivity Human Cytokine Magnetic Bead Panel                                      | 78.0-99.9  |
| 3              | Choi et al., 2017 [58]          | Healthy                      | Men and women  | 30-64                                                                      | LC-MS/MS                               | N.R.   | N.R.      | TIA                                                                                                              | N.R.       |
| 4              | Ferguson et al., 2016 [59]      | Healthy                      | Pregnant women | N.R.                                                                       | ID-LC-MS/MS                            | N.R.   | N.R.      | Enzyme-linked immunosorbent assay and sensitivity Human Cytokine Magnetic Bead Panel                             | N.R.       |
| 5              | Haq et al., 2020 [60]           | Healthy/diabetes             | Men and women  | 43.86 ± 13.61*                                                             | ELISA                                  | N.R.   | N.R.      | ELISA                                                                                                            | N.R.       |
| 6              | Huang et al., 2017 [61]         | Healthy                      | Pregnant women | 18-45                                                                      | UPLC                                   | N.R.   | 0.16      | ELISA and SYNCHRON Systems reagent with the highly sensitive near infrared particle immunoassay rate methodology | 0.0-100.0  |
| 7              | Jain et al., 2020 [62]          | Healthy/diabetes             | Men and women  | 44.12 ± 8.5*                                                               | N.R.                                   | N.R.   | N.R.      | ELISA                                                                                                            | N.R.       |
| 8              | Kelley et al., 2019 [63]        | Healthy                      | Pregant women  | 18-42                                                                      | LC-MS/MS                               | N.R.   | N.R.      | N.R.                                                                                                             | N.R.       |
| 9              | Lang et al., 2008 [64]          | Healthy                      | Men and women  | 18-74                                                                      | HPLC                                   | N.R.   | N.R.      | Latexenhanced nephelometry                                                                                       | N.R.       |
| 10             | Liang et al., 2020 [65]         | URSA                         | Women          | 20-40                                                                      | UPLC-MS/MS                             | N.R.   | 0.01-0.10 | Multiplex assay U-PLEX proinflammatory panel 1 kit and single-plex assay V-PLEX assay.                           | 9.0-100.0  |
| 11             | Linares et al., 2021 [66]       | Crohn's disease              | Men and women  | 40                                                                         | UPLC-MS/MS                             | N.R.   | N.R.      | N.R.                                                                                                             | N.R.       |
| 12             | Mohsen et al., 2018 [67]        | Healthy                      | Boys and girls | 6-16                                                                       | LC-MS/MS                               | 500 µL | N.R.      | ELISA                                                                                                            | N.R.       |
| 13             | Nalbantoğlu et al., 2021 [68]   | Healthy/allergic rhinitis    | Boys and girls | Healthy children: 8.32 ± 1.29*<br>Allergic rhinitis children: 8.78 ± 1.51* | ELISA                                  | 10 mL  | N.R.      | ELISA                                                                                                            | N.R.       |
| 14             | Qu et al., 2022 [69]            | Healthy/rheumatoid arthritis | Men and women  | 55                                                                         | UPLC-MS/MS                             | 500 µL | 0.05-0.12 | Immunoturbidimetry                                                                                               | N.R.       |
| 15             | Savastano et al., 2015 [70]     | Healthy                      | Men            | 53.5 ± 5.7*<br>Healthy women : 29.9                                        | ELISA                                  | 500 µL | N.R.      | Human BIO-PLEX Suspension Array Multi-panel System                                                               | N.R.       |
| 16             | Šimková et al., 2020 [71]       | Healthy/PCOS                 | Women          | PCOS women: 28.9-29.5                                                      | LC-MS/MS                               | 500 µL | N.R.      | Multiplex immunoanalytic xMAP technology - kit #M500KCAF0Y Bio-Plex Pro™ Human Cytokine 27-plex Assay            | N.R.       |
| 17             | Song et al., 2017 [72]          | Healthy                      | Men and women  | ≥60                                                                        | HPLC                                   | N.R.   | 0.01      | High sensitive latex turbidimetric immunoassay, ELISA and autobiochemical analyser                               | N.R.       |
| 18             | Tsen et al., 2021 [73]          | Healthy                      | Men and women  | 20-45                                                                      | LC-MS/MS                               | 1 mL   | 0.10      | Quantikine® human immunoassay kits                                                                               | N.R.       |
| 19             | Watkins et al., 2015 [43]       | Healthy                      | Pregnant women | 18-40                                                                      | ID-LC-MS/MS                            | N.R.   | 0.20-0.40 | ELISA and Milliplex MAP High Sensitivity Human Cytokine Magnetic Bead Panel                                      | 64.0-100.0 |
| 20             | Yang et al., 2009 [74]          | Healthy                      | Men and women  | 45.9-57.0                                                                  | LC-MS/MS                               | 500 µL | 0.06      | High sensitive assay                                                                                             | 100.0      |

URSA: unexplained recurrent spontaneous abortion; PCOS: Polycystic Ovary Syndrome; GC-MS-MS: gas chromatography-mass spectrometry; ID-LC-MS/MS: isotope dilution-liquid chromatography-tandem mass spectrometry; LC-MS/MS: liquid chromatography-mass spectrometry; UPLC: acquity ultraperformance liquid chromatography; UPLC-MS/MS: ultra-performance liquid chromatography-tandem mass spectrometry; ELISA: enzyme-linked immunosorbent assay; HPLC: high performance liquid chromatography; TIA: turbido-immunometric assay; LOD: limit of detection; FD: frequency of detection; N.R.: Not reported. \*Mean ± standard deviation.
